# Supplementary material for: Control of false discoveries in grouped hypothesis testing for eQTL data
Source: PubMed Central journal article supplement (PMC11007981; doi:10.1186/s12859-024-05736-3), 2024-04-11
Supplement: 12859_2024_5736_MOESM1_ESM.pdf [file 12859_2024_5736_MOESM1_ESM.pdf]

# Control of False Discoveries in Grouped Hypothesis Testing for eQTL Data Supplementary Materials

Pratyaydipta Rudra<sup>1, \*</sup>, Yi-Hui Zhou<sup>2</sup>, Andrew Nobel<sup>3</sup>, and Fred A. Wright<sup>4</sup>

<sup>1</sup>Department of Statistics, Oklahoma State University, Stillwater, OK, USA

<sup>2,4</sup>Bioinformatics Research Center, Departments of Biological Sciences and Statistics, North Carolina State University, Raleigh, NC, USA

<sup>3</sup>Department of Statistics and Operations Research, University of North Carolina, Chapel Hill, NC, USA

\*Corresponding author. Email: prudra@okstate.edu

## 1 An EM algorithm to estimate *REG-FDR* parameters

The log-likelihood for *REG-FDR* is

$$L(\pi_0, \sigma | X, Y) = \log(p(X)) + \sum_{i=1}^N \log\left[\pi_0 f_0(Y_i) + (1 - \pi_0) \frac{1}{m_i} \sum_{j=1}^{m_i} f_1(Y_i | X_j^{(i)}, \sigma)\right]$$

where  $p(X)$  is the marginal density of  $X$  that we avoid modelling, but assume to be free of  $\pi_0$  and  $\sigma$ . We introduce the following unobserved variables.

$\delta_i = 1$  or  $0$  according as the  $i$ th gene has an eQTL or not,  $i = 1, 2, \dots, N$ .

$S_{ij} = 1$  or  $0$  according as the  $j$ th SNP local to the  $i$ th gene is causal or not,  $j = 1, 2, \dots, m_i$ .

Given the data  $(X, Y)$ ,  $\delta_i$  follows *Bernoulli*( $1 - \pi_0$ ). Given the data and  $\delta_i = 1$ ,  $(S_{i1}, S_{i2}, \dots, S_{im_i})$  follows a *Multinomial*( $1; 1/m_i, 1/m_i, \dots, 1/m_i$ ) distribution.

Now the complete log-likelihood becomes

$$\begin{aligned} L_c(\pi_0, \sigma | X, Y, \delta, S) \\ = \log(p(X)) + \sum_{i=1}^N \log\left[(\pi_0 f_0(Y_i))^{(1-\delta_i)} \left((1 - \pi_0) \frac{1}{m_i} \prod_{j=1}^{m_i} f_1(Y_i | X_j^{(i)}, \sigma)^{S_{ij}}\right)^{\delta_i}\right] \end{aligned}$$

$$\begin{aligned}
&= \log(p(X)) + \sum_{i=1}^N (1 - \delta_i) \log(f(Y_i)) \\
&\quad + \sum_{i=1}^N [(1 - \delta_i) \log(\pi_0) + \delta_i \log(1 - \pi_0)] + \sum_{i=1}^N \sum_{j=1}^m S_{ij} \delta_i \log[f_1(Y_i | X_j^{(i)}, \sigma)]
\end{aligned}$$

The M-step gives

$$\hat{\pi}_0 = \frac{1}{N} \sum_{i=1}^N (1 - \delta_i)$$

and

$$\hat{\sigma} = \underset{\sigma}{\text{ArgMax}} \sum_{i=1}^N \sum_{j=1}^m S_{ij} \delta_i \log[f_1(Y_i | X_j^{(i)}, \sigma)]$$

In the  $k$ th iteration, the E-step replaces  $\delta_i$  by  $E(\delta_i | X, Y, \hat{\pi}_0^{(k-1)}, \hat{\sigma}^{(k-1)})$  and  $S_{ij} \delta_i$  by  $E(S_{ij} \delta_i | X, Y, \hat{\pi}_0^{(k-1)}, \hat{\sigma}^{(k-1)})$ . These are given by

$$E(\delta_i | X, Y, \hat{\pi}_0^{(k-1)}, \hat{\sigma}^{(k-1)}) = \frac{(1 - \hat{\pi}_0^{(k-1)}) \frac{1}{m_i} \sum_{j=1}^{m_i} f_1(Y_i | X_j^{(i)}, \hat{\sigma}^{(k-1)})}{\hat{\pi}_0^{(k-1)} f_0(Y_i) + (1 - \hat{\pi}_0^{(k-1)}) \frac{1}{m_i} \sum_{j=1}^{m_i} f_1(Y_i | X_j^{(i)}, \hat{\sigma}^{(k-1)})}$$

and

$$E(S_{ij} \delta_i | X, Y, \hat{\pi}_0^{(k-1)}, \hat{\sigma}^{(k-1)}) = E(\delta_i | X, Y, \hat{\pi}_0^{(k-1)}, \hat{\sigma}^{(k-1)}) \times \frac{f_1(Y_i | X_j^{(i)}, \hat{\sigma}^{(k-1)})}{\sum_{t=1}^{m_i} f_1(Y_i | X_t^{(i)}, \hat{\sigma}^{(k-1)})}$$

The updating continues until  $|L(\hat{\pi}_0^{(k+1)}, \hat{\sigma}^{(k+1)} | X, Y) - L(\hat{\pi}_0^{(k)}, \hat{\sigma}^{(k)} | X, Y)|$  becomes sufficiently small.

## 2 Dependence of conditional distribution on the correlation structure

The following lemma shows the extent to which the conditional distribution  $f_{0|k}$  might depend on the effect size for any correlation structure among normally distributed SNPs. We use a trivariate normal distribution for illustration, as it is rich enough for demonstration while still analytically tractable.

**Lemma 1.** *Suppose  $(X_1, X_2, X_3)$  are jointly normal with mean  $(0, 0, 0)$  and covariance ma-*

trix

$$\begin{pmatrix} 1 & \rho_1 & \rho_2 \\ \rho_1 & 1 & \rho_3 \\ \rho_2 & \rho_3 & 1 \end{pmatrix}.$$

Let  $Y = \beta X_1 + \epsilon$ , where  $\epsilon \sim N(0, 1 - \beta^2)$ , and  $r_1, r_2, r_3$  denote the sample product moment correlation coefficient of  $Y$  with  $X_1, X_2$  and  $X_3$  respectively for a sample of size  $n$ . The asymptotic correlations between these sample correlations are given by

$$\text{Cor}(r_1, r_2) = \rho_{12} = \frac{\rho_1(2 - \beta^2 - \beta^2 \rho_1^2)}{2n(1 - \beta^2 \rho_1^2)}$$

and

$$\text{Cor}(r_2, r_3) = \rho_{23} = \frac{2\rho_3 + \beta^2(\rho_1^2 + \rho_2^2)(\beta^2 \rho_1 \rho_2 - 2\rho_3) + \beta^2 \rho_1 \rho_2 (\rho_3^2 - 1)}{2n(1 - \beta^2 \rho_1^2)(1 - \beta^2 \rho_2^2)},$$

$\rho_{13}$  having the same form as  $\rho_{12}$ .

*Proof.* For the  $i$ th sample, let us define

$$\mathbf{Z}_i = (X_{1i}, X_{2i}, X_{3i}, Y_i, X_{1i}^2, X_{2i}^2, X_{3i}^2, Y_i^2, X_{1i}Y_i, X_{2i}Y_i, X_{3i}Y_i).$$

Clearly,  $E(\mathbf{Z}_i) = \mu = (0, 0, 0, 0, 1, 1, 1, 1, \rho_1, \rho_2, \rho_3)$ , and suppose  $V(\mathbf{Z}_i) = \Sigma = (\sigma_{ij})_{11 \times 11}$ .

Define the functions  $g_1, g_2$  and  $g_3$ , all  $\mathbb{R}^{11} \rightarrow \mathbb{R}$ , as

$$g_1(x_1, x_2, \dots, x_{11}) = \frac{x_9 - x_1 x_4}{\sqrt{(x_5 - x_1^2)(x_8 - x_4^2)}},$$

$$g_2(x_1, x_2, \dots, x_{11}) = \frac{x_{10} - x_2 x_4}{\sqrt{(x_6 - x_2^2)(x_8 - x_4^2)}},$$

$$g_3(x_1, x_2, \dots, x_{11}) = \frac{x_{11} - x_3 x_4}{\sqrt{(x_7 - x_3^2)(x_8 - x_4^2)}}.$$

Then,  $r_1 = g_1(\bar{\mathbf{Z}})$ ,  $r_2 = g_2(\bar{\mathbf{Z}})$  and  $r_3 = g_3(\bar{\mathbf{Z}})$ .

By the delta method,

$$\sqrt{n}(r_1 - \beta, r_2 - \beta \rho_1, r_3 - \beta \rho_2) \xrightarrow{d} N(\mathbf{0}, \Gamma),$$

where  $\Gamma_{ij} = \sum_{k=1}^{11} \sum_{l=1}^{11} \sigma_{kl} \frac{\partial g_i}{\partial \mu_k} \frac{\partial g_j}{\partial \mu_l}$ ;  $i = 1, 2, 3$ ;  $j = 1, 2, 3$ .

Now,

$$\frac{\partial g_1}{\partial \mu_1} = \frac{\partial g_1}{\partial \mu_2} = \frac{\partial g_1}{\partial \mu_3} = \frac{\partial g_1}{\partial \mu_4} = \frac{\partial g_1}{\partial \mu_6} = \frac{\partial g_1}{\partial \mu_7} = \frac{\partial g_1}{\partial \mu_{10}} = \frac{\partial g_1}{\partial \mu_{11}} = 0,$$

$$\frac{\partial g_1}{\partial \mu_5} = \frac{\partial g_1}{\partial \mu_8} = -\frac{1}{2}\beta, \quad \frac{\partial g_1}{\partial \mu_9} = 1.$$

$$\frac{\partial g_2}{\partial \mu_1} = \frac{\partial g_2}{\partial \mu_2} = \frac{\partial g_2}{\partial \mu_3} = \frac{\partial g_2}{\partial \mu_4} = \frac{\partial g_2}{\partial \mu_5} = \frac{\partial g_2}{\partial \mu_7} = \frac{\partial g_2}{\partial \mu_9} = \frac{\partial g_2}{\partial \mu_{11}} = 0,$$

$$\frac{\partial g_2}{\partial \mu_6} = \frac{\partial g_2}{\partial \mu_8} = -\frac{1}{2}\beta\rho_1, \quad \frac{\partial g_2}{\partial \mu_{10}} = 1.$$

$$\frac{\partial g_3}{\partial \mu_1} = \frac{\partial g_3}{\partial \mu_2} = \frac{\partial g_3}{\partial \mu_3} = \frac{\partial g_3}{\partial \mu_4} = \frac{\partial g_3}{\partial \mu_5} = \frac{\partial g_3}{\partial \mu_6} = \frac{\partial g_3}{\partial \mu_9} = \frac{\partial g_3}{\partial \mu_{10}} = 0,$$

$$\frac{\partial g_3}{\partial \mu_7} = \frac{\partial g_3}{\partial \mu_8} = -\frac{1}{2}\beta\rho_2, \quad \frac{\partial g_3}{\partial \mu_{11}} = 1.$$

Since the partial derivative matrix is very sparse, we don't need to calculate all the terms of the matrix  $\Sigma$ . The ones that are needed are calculated below.

$$\sigma_{5,6} = E(X_1^2 X_2^2) - 1 = 2\rho_1^2 + 1 - 1 = 2\rho_1^2$$

$$\sigma_{5,8} = E(X_1^2 Y^2) - 1 = 2\beta^2 + 1 - 1 = 2\beta^2$$

$$\sigma_{5,10} = E(X_1^2 X_2 Y) - \beta\rho_1 = 3\beta\rho_1 - \beta\rho_1 = 2\beta\rho_1$$

$$\sigma_{8,6} = E(X_2^2 Y^2) - 1 = 2\beta^2\rho_1^2 + 1 - 1 = 2\beta^2\rho_1^2$$

$$\sigma_{8,8} = E(Y^4) - 1 = 2$$

$$\sigma_{8,10} = E(X_2 Y^3) - \beta\rho_1 = 3\beta\rho_1 - \beta\rho_1 = 2\beta\rho_1$$

$$\sigma_{9,6} = E(X_1 X_2^2 Y) - \beta = 2\beta\rho_1^2 + \beta - \beta = 2\beta\rho_1^2$$

$$\sigma_{9,8} = E(X_1 Y^3) - \beta = 3\beta - \beta = 2\beta$$

$$\sigma_{9,10} = E(X_1 X_2 Y^2) - \beta^2\rho_1 = 2\beta^2\rho_1 + \rho_1 - \beta^2\rho_1 = \rho_1(1 + \beta^2)$$

$$\sigma_{6,7} = E(X_2^2 X_3^2) - 1 = 2\rho_3^2 + 1 - 1 = 2\rho_3^2$$

$$\sigma_{6,11} = E(X_2^2 X_3 Y) - \beta\rho_2 = 2\beta\rho_1\rho_3 + \beta\rho_2 - \beta\rho_2 = 2\beta\rho_1\rho_3$$

$$\sigma_{8,7} = E(X_3^2 Y^2) - 1 = 2\beta^2\rho_2^2 + 1 - 1 = 2\beta^2\rho_2^2$$

$$\sigma_{8,11} = E(X_3 Y^3) - \beta\rho_2 = 3\beta\rho_2 - \beta\rho_2 = 2\beta\rho_2$$

$$\sigma_{10,7} = E(X_2 X_3^2 Y) - \beta\rho_2 = 2\beta\rho_2\rho_3 + \beta\rho_2 - \beta\rho_2 = 2\beta\rho_2\rho_3$$

$$\sigma_{10,11} = E(X_2 X_3 Y^2) - \beta^2\rho_1\rho_2 = \rho_3 + 2\beta^2\rho_1\rho_2 - \beta^2\rho_1\rho_2 = \rho_3 + \beta^2\rho_1\rho_2$$

Combining, we get,

$$Cov(\sqrt{n}(r_1 - \beta), \sqrt{n}(r_2 - \beta\rho_1)) = \frac{\rho_1}{2}(1 - \beta^2)(2 - \beta^2 - \beta^2\rho_1^2),$$

$$Cov(\sqrt{n}(r_2 - \beta\rho_1), \sqrt{n}(r_3 - \beta\rho_2)) = 2\rho_3 + \beta^2(\rho_1^2 + \rho_2^2)(\beta^2\rho_1\rho_2 - 2\rho_3) + \beta^2\rho_1\rho_2(\rho_3^2 - 1).$$

Also,

$$Var(\sqrt{n}(r_1 - \beta)) = (1 - \beta^2)^2, \quad Var(\sqrt{n}(r_2 - \beta\rho_1)) = (1 - \beta^2\rho_1^2)^2, \quad Var(\sqrt{n}(r_3 - \beta\rho_2)) = (1 - \beta^2\rho_2^2)^2.$$

Hence,

$$\text{Cor}(r_1, r_2) = \rho_{12} = \frac{\rho_1(2 - \beta^2 - \beta^2\rho_1^2)}{2n(1 - \beta^2\rho_1^2)}$$

and

$$\text{Cor}(r_2, r_3) = \rho_{23} = \frac{2\rho_3 + \beta^2(\rho_1^2 + \rho_2^2)(\beta^2\rho_1\rho_2 - 2\rho_3) + \beta^2\rho_1\rho_2(\rho_3^2 - 1)}{2n(1 - \beta^2\rho_1^2)(1 - \beta^2\rho_2^2)}.$$

□

**Corollary 1.1.** *Let  $z_1, z_2$  and  $z_3$  be the Fisher transformed unscaled  $z$ -statistics corresponding to  $r_1, r_2$  and  $r_3$ . Then,*

$$\sqrt{n-3} \begin{pmatrix} z_1 - \tanh^{-1}(\beta) \\ z_2 - \tanh^{-1}(\beta\rho_1) \\ z_3 - \tanh^{-1}(\beta\rho_2) \end{pmatrix} \xrightarrow{d} N(\mathbf{0}, \begin{bmatrix} 1 & \rho_{12} & \rho_{13} \\ \rho_{12} & 1 & \rho_{23} \\ \rho_{13} & \rho_{23} & 1 \end{bmatrix}),$$

where

$$\rho_{12} = \frac{\rho_1(2 - \beta^2 - \beta^2\rho_1^2)}{2(1 - \beta^2\rho_1^2)}$$

and

$$\rho_{23} = \frac{2\rho_3 + \beta^2(\rho_1^2 + \rho_2^2)(\beta^2\rho_1\rho_2 - 2\rho_3) + \beta^2\rho_1\rho_2(\rho_3^2 - 1)}{2(1 - \beta^2\rho_1^2)(1 - \beta^2\rho_2^2)},$$

$\rho_{13}$  having the same form as  $\rho_{12}$ .

**Corollary 1.2.** *The covariance of the  $z$ -statistics converge to the covariance matrix for the case  $\beta = 0$  as  $|\rho_1| \rightarrow 1$  and  $|\rho_2| \rightarrow 1$ , or  $|\rho_1| \rightarrow 0$  and  $|\rho_2| \rightarrow 0$ . This is also true for the conditional mean  $E(z_2, z_3|z_1)$ .*

The proof of [Corollary 1.1](#) and [Corollary 1.2](#) follows directly from [Lemma 1](#). Clearly, similar results apply to more than three variables. [Corollary 1.2](#) immediately implies that the conditional distribution of  $(z_2, z_3|z_1)$  is approximately free of  $\beta$  when the correlations  $\rho_1$  and  $\rho_2$  are very large or very small. So, if the data has a block structure where there is very high correlation among SNPs within a block and there is very small correlation across blocks, then assumption (A3) may hold approximately, in a manner that supports the use of Z-REG-FDR.

To understand the difference between null and alternative of the conditional covariance matrices and mean vectors, we calculated the large sample means and covariance matrices under the two cases using [Corollary 1.2](#) of [Lemma 1](#). The dependence structure among the SNPs is (i) assumed to be an AR(1) structure with serial correlation 0.9, (ii) obtained from a real SNP matrix [1].

For case (i), [Figure 1](#) shows the plot of the elements of the conditional covariance matrix under the null and that under the alternative for different effect sizes. The maximum

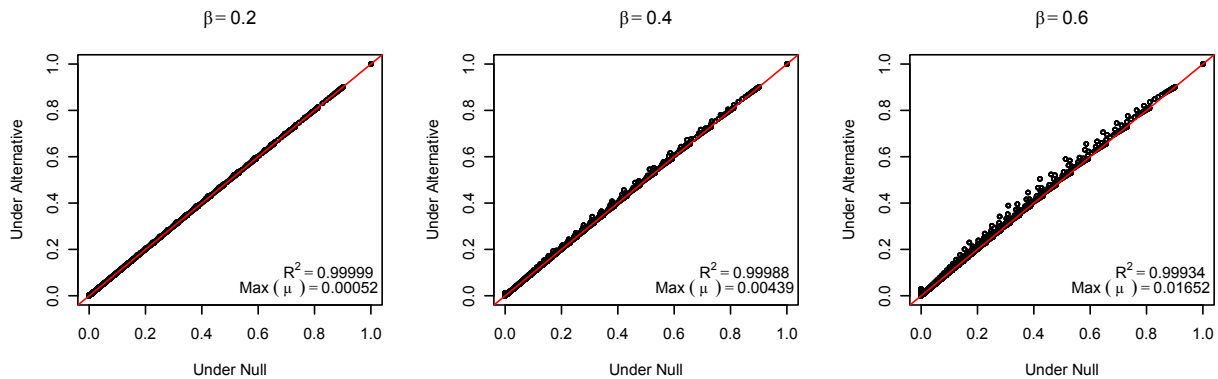

Supplementary Figure 1: Comparing the elements of conditional covariance matrix of  $Z$  under the null and those under the alternative. The  $R^2$  as well as the maximum difference in the conditional means are reported. The correlation structure of the SNPs is assumed to be AR(1).  $\beta$  is the effect size.

difference in the conditional mean is also reported for each case. [Figure 2](#) shows the same plot for case (ii). The fact that the differences are small, especially for the real SNP matrix, is an encouraging sign in favor of  $Z$ -REG-FDR. [Figure 3](#) shows that under simulations, the estimated FDR based on true parameters agrees with estimated FDR based on  $Z$ -REG-FDR and REG-FDR both.

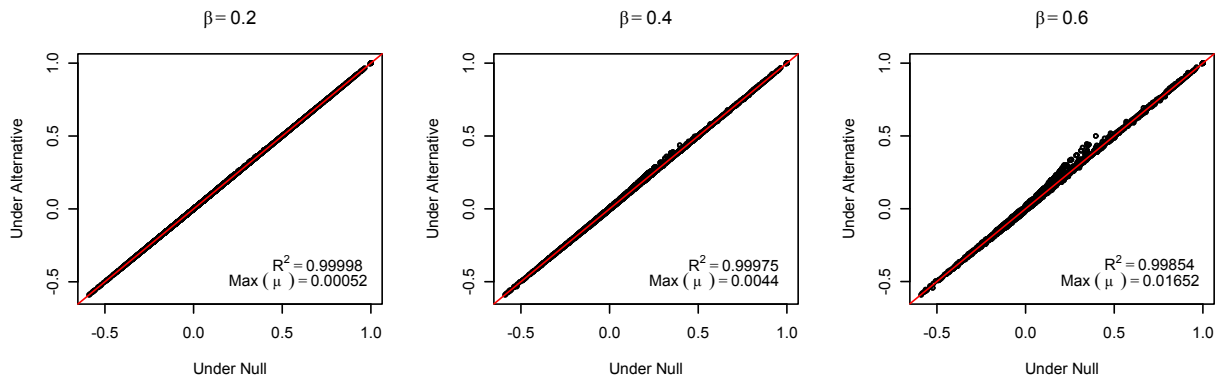

Supplementary Figure 2: Comparing the elements of conditional covariance matrix of  $Z$  under the null and those under the alternative. The  $R^2$  as well as the maximum difference in the conditional means are reported. The correlation structure of the SNPs is obtained from a real data.  $\beta$  is the effect size.

### 3 Effect of more than one causal SNPs

One concern about our model is that it may have limited applicability for large cis-windows since it uses the assumption of only one causal SNP. We have explored through simulation the effect of more than one causal SNPs on the control of the FDR. We observed that under certain conditions, even in the presence of two causal SNPs, *Z-REG-FDR* is only very slightly anti-conservative.

| True $\pi_0$ | True $\sigma$ | Mean $\hat{\pi}_0$ | Mean $\hat{\sigma}$ | SE( $\hat{\pi}_0$ ) | SE( $\hat{\sigma}$ ) | Realized FDR(5%) | Realized FDR(10%) |
|--------------|---------------|--------------------|---------------------|---------------------|----------------------|------------------|-------------------|
| 0.10         | 1             | 0.2178             | 1.1354              | 0.0800              | 0.0508               | 0.0320           | 0.0533            |
| 0.10         | 2             | 0.0942             | 2.1099              | 0.0237              | 0.0264               | 0.0566           | 0.0945            |
| 0.10         | 5             | 0.0884             | 5.1313              | 0.0070              | 0.0218               | 0.0574           | 0.0999            |
| 0.20         | 1             | 0.3039             | 1.1353              | 0.0764              | 0.0550               | 0.0439           | 0.0780            |
| 0.20         | 2             | 0.1926             | 2.1071              | 0.0241              | 0.0294               | 0.0545           | 0.1066            |
| 0.20         | 5             | 0.1885             | 5.1269              | 0.0077              | 0.0278               | 0.0549           | 0.1075            |

Supplementary Table 1: Showing summary of the simulation studies for two causal SNPs

**Table 1** shows the results for simulated dataset. Under the alternative hypothesis, the expressions are simulated using one primary causal SNP for which the Fisher transformed effect size follows a normal distribution with standard deviation  $\sigma$ , and there might exist (with probability 1/2) a secondary causal SNP which has an effect size that is smaller in magnitude and has the same sign as the primary effect size. Note that it is not possible to have the secondary effect size to be unconstrained and at the same time maintain the desired variance of  $Y$ . It can be shown that the simulation using the above mentioned conditions is always feasible. **Table 1** demonstrates that if the secondary effect size is not very large and has the same direction, then *Z-REG-FDR* achieves reasonable control of the FDR.

## 4 Additional Supplementary Figures and Tables

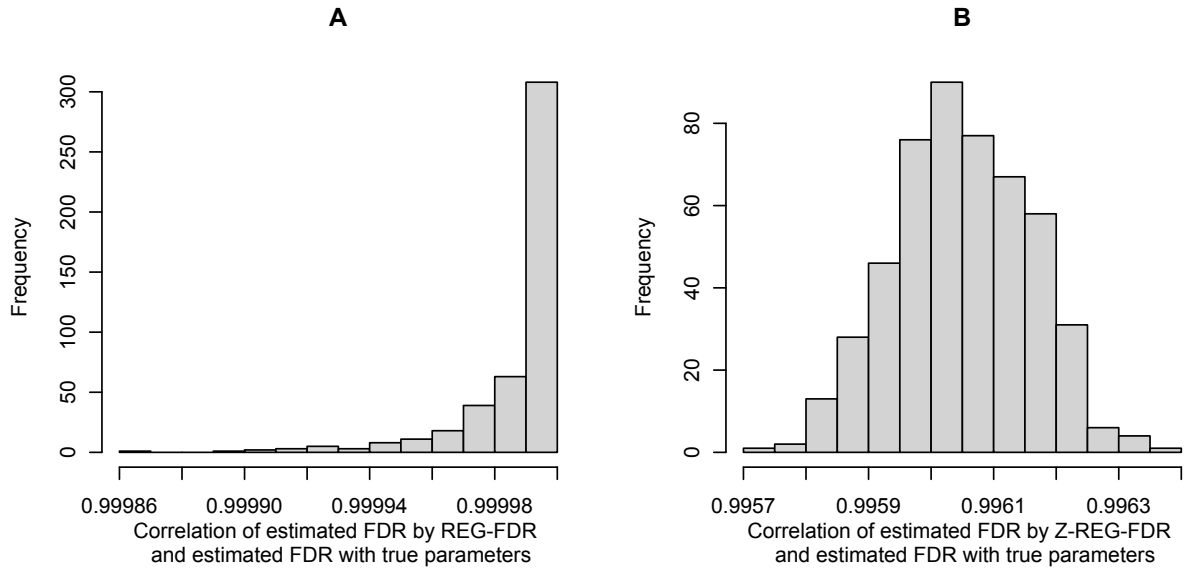

Supplementary Figure 3: Showing the histograms of correlations between the estimated FDR based on the true values of the parameters and that based on **A.** *REG-FDR* **B.** *Z-REG-FDR*. Simulation was conducted using the scheme described in Section 3.2 in the main paper.

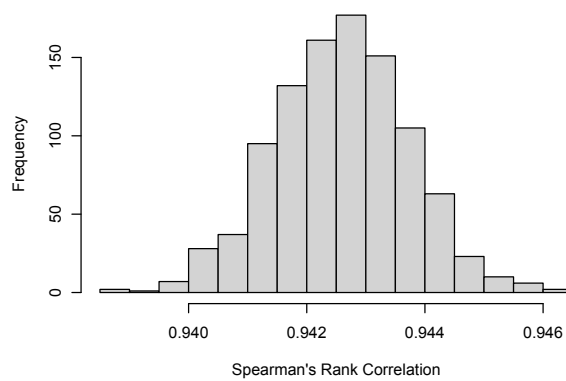

Supplementary Figure 4: Showing the histogram of correlations between estimated FDR using the permutation method and that using *Z-REG-FDR*.



| Tissue                            | $n$ | $Z\text{-REG-FDR}$ | Number of significant genes |             |
|-----------------------------------|-----|--------------------|-----------------------------|-------------|
|                                   |     |                    | Simes                       | Permutation |
| Subcutaneous adipose              | 298 | 7995               | 6963                        | 6604        |
| Visceral omentum                  | 185 | 4231               | 3571                        | 3501        |
| Adrenal gland                     | 126 | 2866               | 2693                        | 2514        |
| Aorta                             | 197 | 5150               | 5162                        | 4487        |
| Coronary artery                   | 118 | 2032               | 1882                        | 1822        |
| Tibial artery                     | 285 | 7729               | 6736                        | 6368        |
| Anterior cingulate cortex BA24    | 72  | 1145               | 938                         | 1044        |
| Caudate nucleus                   | 100 | 1945               | 1967                        | 1796        |
| Cerebellar hemisphere             | 89  | 3500               | 2557                        | 2705        |
| Cerebellum                        | 103 | 3560               | 3454                        | 3117        |
| Cortex                            | 96  | 2031               | 2086                        | 1889        |
| Frontal cortex (BA9)              | 92  | 1514               | 1588                        | 1436        |
| Hippocampus                       | 81  | 1046               | 853                         | 942         |
| Hypothalamus                      | 81  | 1113               | 879                         | 1014        |
| Nucleus accumbens (basal ganglia) | 93  | 1554               | 1617                        | 1445        |
| Putamen (basal ganglia)           | 82  | 1530               | 1238                        | 1310        |
| Breast mammary tissue             | 183 | 4019               | 3271                        | 3421        |
| EBV-transformed lymphocytes       | 114 | 2558               | 2360                        | 2287        |
| Fibroblasts                       | 272 | 8678               | 7513                        | 6947        |
| Sigmoid colon                     | 124 | 2544               | 2269                        | 2258        |
| Transverse colon                  | 169 | 4406               | 3723                        | 3662        |
| Gastroesophageal junction         | 127 | 2489               | 2237                        | 2225        |
| Esophagus mucosa                  | 241 | 6794               | 6169                        | 5700        |
| Esophagus muscularis              | 218 | 6126               | 5731                        | 5234        |
| Atrial appendage                  | 159 | 3746               | 3284                        | 3137        |
| Left ventricle                    | 190 | 4484               | 3855                        | 3716        |
| Liver                             | 97  | 1242               | 1231                        | 1184        |
| Lung                              | 278 | 6815               | 5884                        | 5818        |
| Skeletal muscle                   | 361 | 7175               | 6049                        | 5841        |
| Tibial nerve                      | 256 | 9374               | 8087                        | 7640        |
| Ovary                             | 85  | 1404               | 1167                        | 1259        |
| Pancreas                          | 149 | 3938               | 3621                        | 3352        |
| Pituitary                         | 87  | 2168               | 1607                        | 1861        |
| Prostate                          | 87  | 1391               | 1045                        | 1233        |
| Skin (Not sun-exposed )           | 196 | 4373               | 4499                        | 3905        |
| Skin (Sun-exposed)                | 302 | 8304               | 7109                        | 6882        |
| Small intestine terminal ileum    | 77  | 1306               | 1002                        | 1150        |
| Spleen                            | 89  | 2822               | 2163                        | 2267        |
| Stomach                           | 170 | 3420               | 2938                        | 2927        |
| Testis                            | 157 | 8430               | 6796                        | 7003        |
| Thyroid                           | 278 | 9498               | 7976                        | 7809        |
| Uterus                            | 70  | 882                | 655                         | 774         |
| Vagina                            | 79  | 933                | 582                         | 792         |
| Whole blood                       | 338 | 6887               | 5862                        | 5814        |

Supplementary Table 2: Number of significant genes found by different methods across the tissues of the GTEx data

## References

- [1] John Lonsdale, Jeffrey Thomas, Mike Salvatore, Rebecca Phillips, Edmund Lo, Saboor Shad, Richard Hasz, Gary Walters, Fernando Garcia, Nancy Young, et al. The genotype-tissue expression (gtex) project. *Nature genetics*, 45(6):580–585, 2013.
